# Supplementary material
Source: MDPI journal article supplement (https://www.mdpi.com/1424-2818/12/9/349)
Supplement: s1 [file s1]

| Sample | Host tree 1                      | Host tree 2                      | Macroclimate* | Altitude | Soil**                    |
|--------|----------------------------------|----------------------------------|---------------|----------|---------------------------|
| T1     | <i>Quercus pubescens</i> Willd.  |                                  | Temperate     | 450      | Calcaric Cambisols        |
| T2     | <i>Quercus ilex</i> L.           |                                  | Mediterranean | 750      | Lithic Eutric Leptosols   |
| T3     | <i>Quercus ilex</i> L.           |                                  | Mediterranean | 750      | Lithic Eutric Leptosols   |
| T4     | <i>Quercus pubescens</i> Willd.  | <i>Corylus avellana</i> L.       | Temperate     | 700      | Calcaric Cambisols        |
| T5     | <i>Corylus avellana</i> L.       | <i>Ostrya carpinifolia</i> Scop. | Temperate     | 650      | Calcaric Phaeozems        |
| T6     | <i>Fagus sylvatica</i> L.        |                                  | Temperate     | 1200     | Calcaric Leptic Phaeozems |
| T7     | <i>Quercus ilex</i> L.           |                                  | Mediterranean | 70       | Calcic Luvisol            |
| T8     | <i>Quercus ilex</i> L.           |                                  | Mediterranean | 77       | Cambic Leptic Phaeozems   |
| T12    | <i>Fagus sylvatica</i> L.        |                                  | Temperate     | 1200     | Calcaric Leptic Phaeozems |
| T14    | <i>Fagus sylvatica</i> L.        |                                  | Temperate     | 1200     | Calcaric Leptic Phaeozems |
| T15    | <i>Fagus sylvatica</i> L.        |                                  | Temperate     | 1200     | Calcaric Leptic Phaeozems |
| T16    | <i>Fagus sylvatica</i> L.        |                                  | Temperate     | 1000     | Cambic Rendzic Phaeozems  |
| T17    | <i>Fagus sylvatica</i> L.        |                                  | Temperate     | 1000     | Cambic Rendzic Phaeozems  |
| T22    | <i>Corylus avellana</i> L.       | <i>Ostrya carpinifolia</i> Scop. | Temperate     | 650      | Calcaric Phaeozems        |
| T23    | <i>Corylus avellana</i> L.       | <i>Ostrya carpinifolia</i> Scop. | Temperate     | 650      | Calcaric Phaeozems        |
| T26    | <i>Fagus sylvatica</i> L.        |                                  | Temperate     | 1100     | Leptic Phaeozems          |
| T27    | <i>Fagus sylvatica</i> L.        |                                  | Temperate     | 950      | Leptic Phaeozems          |
| T28    | <i>Ostrya carpinifolia</i> Scop. | <i>Corylus avellana</i> L.       | Temperate     | 820      | Leptosols                 |
| T32    | <i>Corylus avellana</i> L.       |                                  | Temperate     | 200      | Fluvic Calcaric Cambisols |
| T35    | <i>Fagus sylvatica</i> L.        |                                  | Temperate     | 1200     | Calcaric Leptic Phaeozems |
| T36    | <i>Fagus sylvatica</i> L.        |                                  | Temperate     | 1200     | Calcaric Leptic Phaeozems |
| T37    | <i>Fagus sylvatica</i> L.        |                                  | Temperate     | 900      | Leptosols                 |
| T38    | <i>Fagus sylvatica</i> L.        |                                  | Temperate     | 900      | Leptosols                 |
| T39    | <i>Fagus sylvatica</i> L.        |                                  | Temperate     | 900      | Leptosols                 |
| T40    | <i>Quercus pubescens</i> Willd.  | <i>Corylus avellana</i> L.       | Temperate     | 400      | Cambisols                 |
| T42    | <i>Fagus sylvatica</i> L.        |                                  | Temperate     | 950      | Calcaric Leptic Phaeozems |
| T43    | <i>Quercus ilex</i> L.           |                                  | Mediterranean | 750      | Lithic Eutric Leptosols   |

\*<http://www.pcn.minambiente.it/viewer/index.php?services=Fitoclima>

\*\*<http://www.soilmaps.it/ita/downloads.html#dati>
