# Supplementary material
Source: MDPI journal article supplement (https://www.mdpi.com/1424-2818/12/9/349)
Supplement: s1 [file s1]

| Accession Number | Organism                  | Length (bp) | Geographical origin      |
|------------------|---------------------------|-------------|--------------------------|
| AF516778         | <i>Tuber mesentericum</i> | 1303        | Unknown                  |
| AF516777         | <i>Tuber mesentericum</i> | 1303        | Unknown                  |
| AF516776         | <i>Tuber mesentericum</i> | 1305        | Unknown                  |
| AF516775         | <i>Tuber mesentericum</i> | 1305        | Unknown                  |
| AF516769         | <i>Tuber mesentericum</i> | 1306        | Unknown                  |
| AY170360         | <i>Tuber mesentericum</i> | 1306        | Unknown                  |
| AY170359         | <i>Tuber mesentericum</i> | 1306        | Unknown                  |
| AY170358         | <i>Tuber mesentericum</i> | 1306        | Unknown                  |
| JX022595         | <i>Tuber mesentericum</i> | 1108        | Sweden                   |
| AF516772         | <i>Tuber aestivum</i>     | 1306        | Unknown                  |
| AF516771         | <i>Tuber aestivum</i>     | 1306        | Unknown                  |
| AF516770         | <i>Tuber aestivum</i>     | 1306        | Unknown                  |
| AY226028         | <i>Tuber aestivum</i>     | 1306        | France                   |
| AY226027         | <i>Tuber aestivum</i>     | 1306        | Italy, Lombardia         |
| AY226026         | <i>Tuber aestivum</i>     | 1306        | Italy, Abruzzo           |
| AY226025         | <i>Tuber aestivum</i>     | 1306        | Italy, Abruzzo           |
| AY226024         | <i>Tuber aestivum</i>     | 1305        | Unknown                  |
| AY226023         | <i>Tuber aestivum</i>     | 1306        | Italy, Abruzzo           |
| AY226022         | <i>Tuber aestivum</i>     | 1306        | Italy, Abruzzo           |
| HE602749         | <i>Tuber aestivum</i>     | 669         | France, Aube             |
| HE602750         | <i>Tuber aestivum</i>     | 669         | France, Aube             |
| HE602748         | <i>Tuber aestivum</i>     | 669         | France, Bouches du Rhône |
| HE602747         | <i>Tuber aestivum</i>     | 669         | France, Gironde          |
| HE602746         | <i>Tuber aestivum</i>     | 669         | France, Yonne            |
| HE602745         | <i>Tuber aestivum</i>     | 669         | France, Vaucluse         |
| HE602744         | <i>Tuber aestivum</i>     | 669         | France, Savoie           |
| HE602743         | <i>Tuber aestivum</i>     | 669         | France, Lot              |
| HE602742         | <i>Tuber aestivum</i>     | 669         | France, Hérault          |
| HE602741         | <i>Tuber aestivum</i>     | 669         | France, Drôme            |
| HE602740         | <i>Tuber aestivum</i>     | 669         | France, Dordogne         |
| HE602739         | <i>Tuber aestivum</i>     | 669         | France, Alpes Maritimes  |
| HE602738         | <i>Tuber aestivum</i>     | 669         | France, Corse Granada    |
| HE602737         | <i>Tuber aestivum</i>     | 669         | Spain                    |
| HE602736         | <i>Tuber aestivum</i>     | 669         | Sweden                   |
| HE602735         | <i>Tuber aestivum</i>     | 669         | Slovakia                 |
| HE602734         | <i>Tuber aestivum</i>     | 669         | Romania                  |
| HE602733         | <i>Tuber aestivum</i>     | 669         | UK                       |
| HE602732         | <i>Tuber aestivum</i>     | 669         | Turkey                   |
| HE602731         | <i>Tuber aestivum</i>     | 669         | Switzerland              |
| HE602730         | <i>Tuber aestivum</i>     | 669         | Luxembourg               |
| HE602729         | <i>Tuber aestivum</i>     | 669         | Hungary                  |
| HE602728         | <i>Tuber aestivum</i>     | 669         | France, Côte d'Or        |
| HE602727         | <i>Tuber aestivum</i>     | 669         | France, Côte d'Or        |
| HE602726         | <i>Tuber aestivum</i>     | 669         | France, Charente         |
| HE602725         | <i>Tuber aestivum</i>     | 669         | France, Charente         |
| JX022565         | <i>Tuber aestivum</i>     | 842         | Italy                    |
| AY170357         | <i>Tuber aestivum</i>     | 1306        | Italy, Abruzzo           |

|          |                       |      |                       |
|----------|-----------------------|------|-----------------------|
| AY170356 | <i>Tuber aestivum</i> | 1306 | Italy, Piemonte       |
| AY170355 | <i>Tuber aestivum</i> | 1306 | Italy, Umbria         |
| AY170354 | <i>Tuber aestivum</i> | 1306 | Italy, Emilia-Romagna |
| AY170353 | <i>Tuber aestivum</i> | 1306 | Italy, Umbria         |
| AY170352 | <i>Tuber aestivum</i> | 1306 | Italy, Abruzzo        |
| AY170351 | <i>Tuber aestivum</i> | 1306 | Italy, Abruzzo        |
| AY170350 | <i>Tuber aestivum</i> | 1306 | Italy, Umbria         |
| AY170349 | <i>Tuber aestivum</i> | 1306 | Italy, Piemonte       |
| AY170348 | <i>Tuber aestivum</i> | 1306 | Italy, Abruzzo        |
